# Supplementary material for: Influence of Semiconductor Morphology on Photocatalytic Activity of Plasmonic Photocatalysts: Titanate Nanowires and Octahedral Anatase Nanoparticles
Source: MDPI journal article supplement (doi:10.3390/nano9101447), 2019-10-11
Supplement: s1 [file s1]

Electronic supplementary information for

# Influence of Semiconductor Morphology on Photocatalytic Activity of Plasmonic Photocatalysts: Titanate Nanowires and Octahedral Anatase Nanoparticles

Zhishun Wei <sup>1,2,\*</sup>, Maya Endo-Kimura <sup>2</sup>, Kunlei Wang <sup>2</sup>, Christophe Colbeau-Justin <sup>3</sup> and Ewa Kowalska <sup>2,\*</sup>

- <sup>1</sup> Hubei Provincial Key Laboratory of Green Materials for Light Industry, Hubei University of Technology, Wuhan 430068, China
- <sup>2</sup> Institute for Catalysis (ICAT), Hokkaido University, N21 W10, Sapporo 001-0021, Japan; m\_endo@cat.hokudai.ac.jp (M.E.-K.); kunlei@cat.hokudai.ac.jp (K.W.)
- <sup>3</sup> Laboratory of Physical Chemistry, UMR 8000, University of Paris-Saclay, 91190 Saint-Aubin, France; christophe.colbeau-justin@u-psud.fr
- \* Correspondence: wei@cat.hokudai.ac.jp (Z.W.); kowalska@cat.hokudia.ac.jp (E.K.)

**Table S1.** Structural properties of photocatalysts

| Name  | Main crystalline form <sup>a</sup>             | Crystallite size <sup>a</sup> /nm | BET <sup>b</sup> /m <sup>2</sup> g <sup>-1</sup> | Morphology (%) |
|-------|------------------------------------------------|-----------------------------------|--------------------------------------------------|----------------|
| OAP   | TiO <sub>2</sub> (anatase)                     | 17                                | 124                                              | octahedral     |
| TNW   | K <sub>2</sub> Ti <sub>8</sub> O <sub>17</sub> | 1.1                               | 360                                              | wire-like      |
| FP-6  | TiO <sub>2</sub> (anatase)                     | 15                                | 97                                               | particle       |
| ST01  | TiO <sub>2</sub> (anatase)                     | 8                                 | 298                                              | particle       |
| TIO10 | TiO <sub>2</sub> (anatase)                     | 15                                | 100                                              | particle       |

<sup>a</sup>Determined by XRD for anatase (OAP, FP-6, ST01 and TIO10) and K<sub>2</sub>Ti<sub>8</sub>O<sub>17</sub> (TNW) forms. <sup>b</sup>Specific surface area estimated by Brunauer, Emmett and Teller method.

**Table S2.** Properties of NMs' deposits and photoabsorption properties of NM-modified OAP samples

| Titania | NM | Sample color | $\lambda_{\max}$ <sup>a</sup> (nm) | Predominant crystalline form <sup>b</sup> | Crystal size of zero-valent metal <sup>b</sup> /nm | Crystal size of metal oxide <sup>b</sup> /nm |
|---------|----|--------------|------------------------------------|-------------------------------------------|----------------------------------------------------|----------------------------------------------|
| OAP     | Au | violet       | 544                                | Au                                        | 5.7                                                | -                                            |
| OAP     | Ag | brown-violet | 415                                | Ag <sub>2</sub> O                         | 7.5                                                | 14.6 (Ag <sub>2</sub> O)                     |
| OAP     | Pt | grey         | 405                                | Pt                                        | 5.4                                                | -                                            |

<sup>a</sup>maximum extinction from DRS. <sup>b</sup>estimated from XRD.

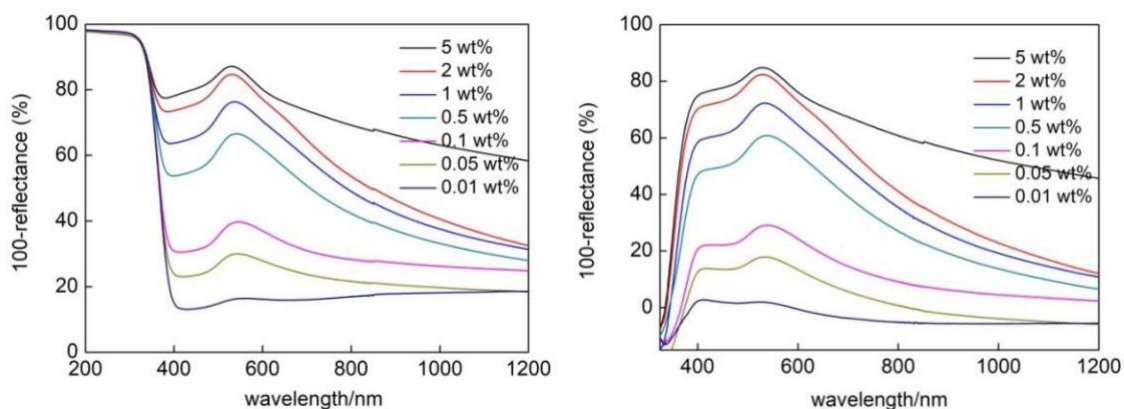

**Figure S1.** Diffuse reflectance spectra of Au/TNW for different gold content (0.01 to 5 wt%) with BaSO<sub>4</sub> (left) and bare TNW (right) as reference, respectively.

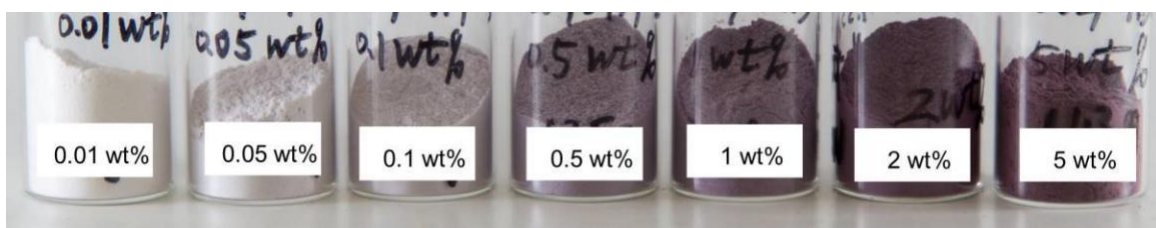

**Figure S2.** The photographs of the gold-modified TNW samples with different gold contents (from 0.01 wt% to 5 wt%; from the left).

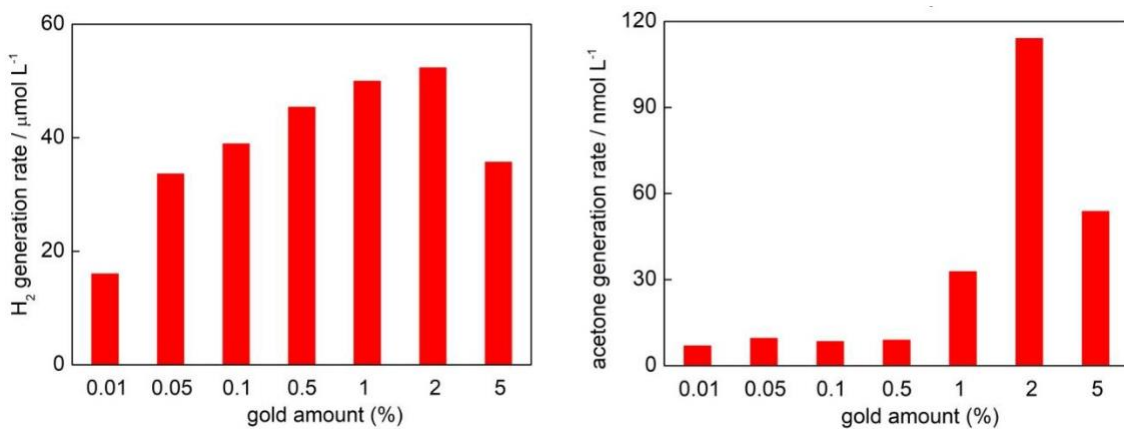

**Figure S3.** Influence of gold amount (0.01 to 5 wt%) on the TNW photocatalytic activity of H<sub>2</sub> generation under UV/vis irradiation (left) and acetone generation under vis irradiation (right).

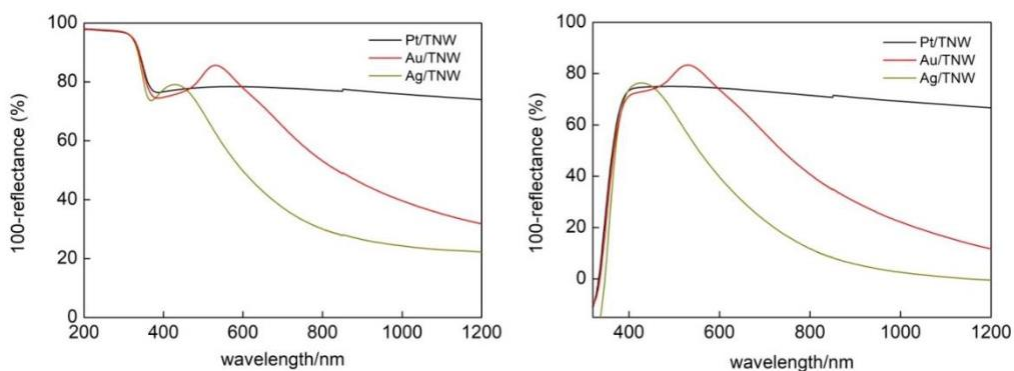

**Figure S4.** Diffuse reflectance spectra of TNW modified with different metals (Au, Ag and Pt). Spectra taken with BaSO<sub>4</sub> (left) and bare TNW (right) as baseline.

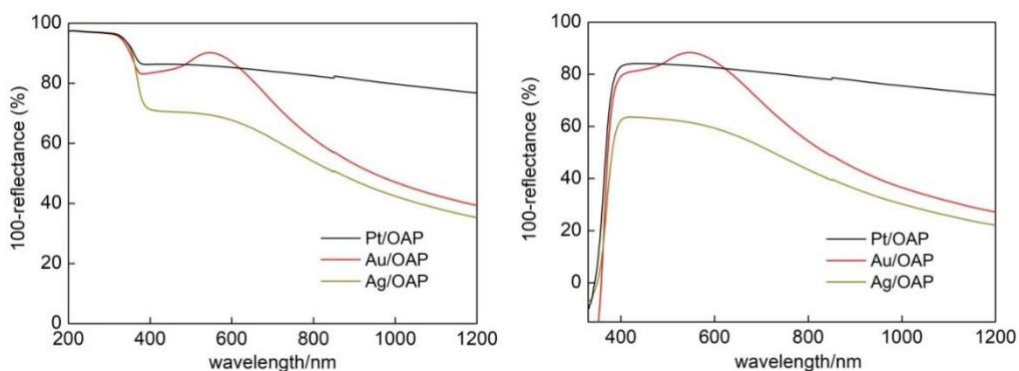

**Figure S5.** Diffuse reflectance spectra of OAP modified with different metals (Au, Ag and Pt). Spectra taken with BaSO<sub>4</sub> (left) and bare TNW (right) as baseline.

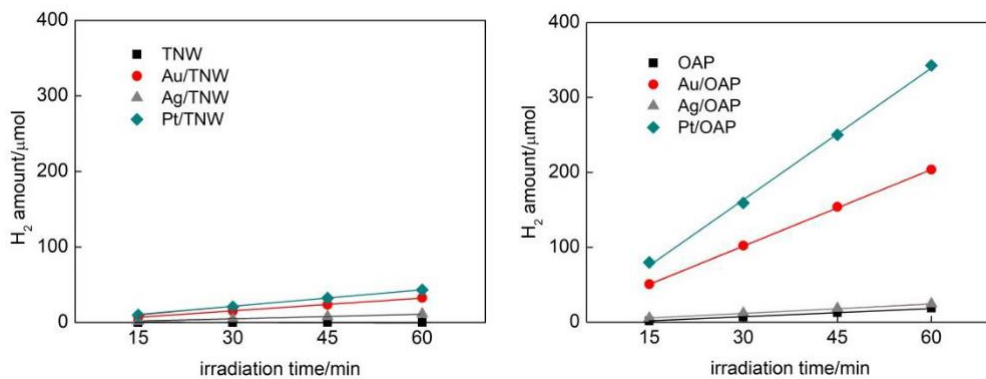

**Figure S6.** Photocatalytic activity for methanol dehydrogenation on bare and metal-modified TNW (left) and OAP (right).

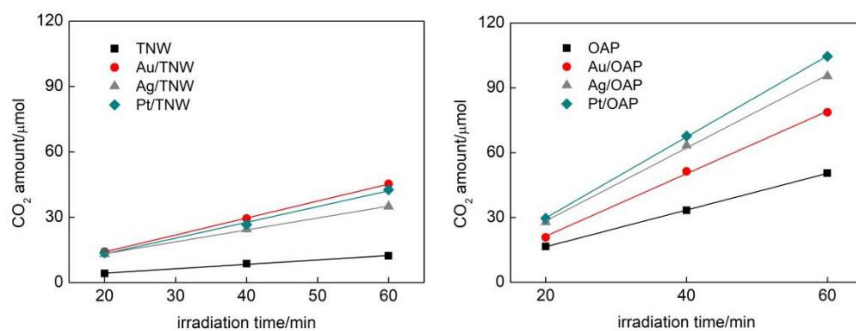

**Figure S7.** Photocatalytic activity for decomposition of acetic acid on bare and NM-modified TNW (left) and OAP (right).

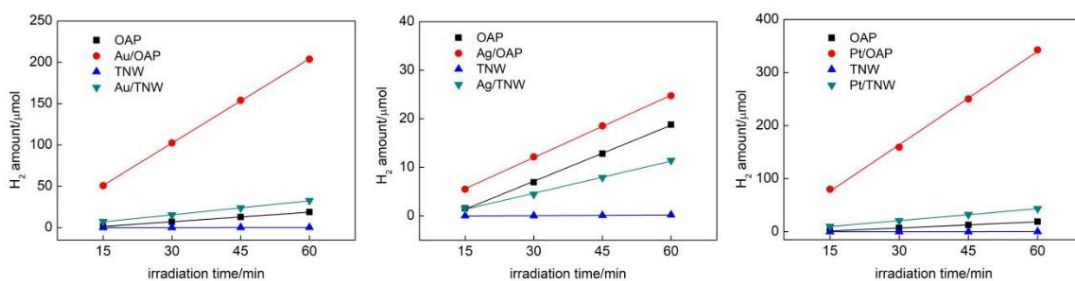

**Figure S8.** Comparison of photocatalytic activity for methanol dehydrogenation on bare and NM-modified TNW and OAP: (left) Au, (center) Ag, (right) Pt.

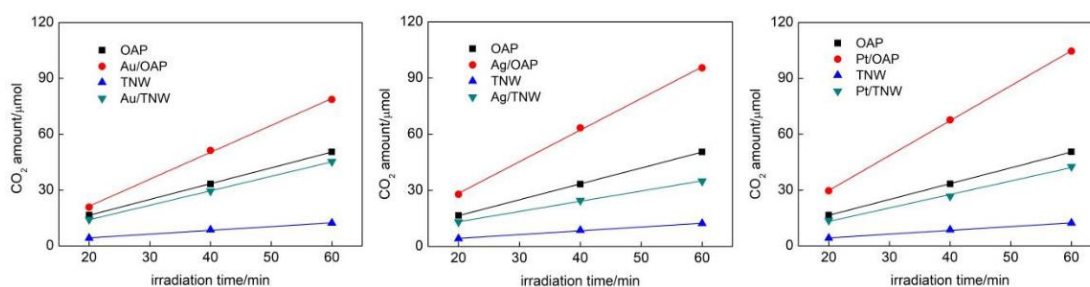

**Figure S9.** Comparison of photocatalytic activity for decomposition of acetic acid on bare and NM-modified TNW and OAP: (left) Au, (center) Ag, (right) Pt.

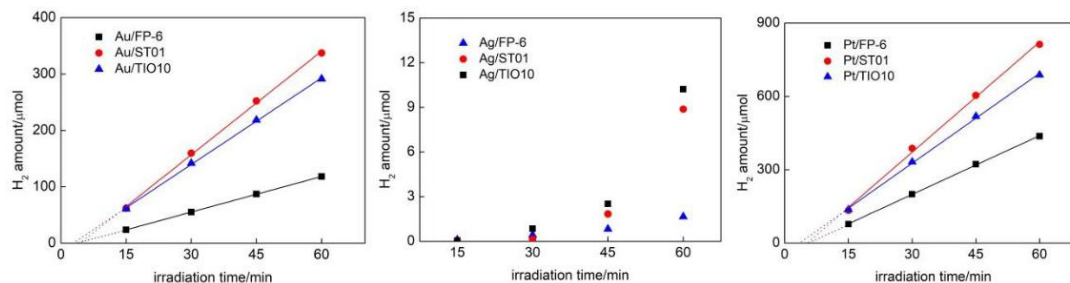

**Figure S10.** Hydrogen evolution during NM photodeposition on: (left) Au on FP-6, ST01 and TIO10, (center) Ag on FP-6, ST01 and TIO10, (right) Pt on FP-6, ST01 and TIO10.
